# Supplementary material
Source: PubMed Central journal article supplement (PMC5527661)
Supplement: AAC.00940-17_zac008176419s1.pdf [file AAC.00940-17_zac008176419s1.pdf]

TABLE S1 The 85 proteins identified by MTB proteome microarray that bound POA

| Name    | SNR   | Function                                                                                                                                                                                                                                                           |
|---------|-------|--------------------------------------------------------------------------------------------------------------------------------------------------------------------------------------------------------------------------------------------------------------------|
| Rv3248c | 10.65 | SAHH                                                                                                                                                                                                                                                               |
| Rv3699  | 10.47 | SAM-dependent methyltransferases                                                                                                                                                                                                                                   |
| Rv3735  | 10.22 | Adenosine specific kinase                                                                                                                                                                                                                                          |
| Rv1003  | 7.16  | Ribosomal RNA small subunit methyltransferase I,also known as rRNA (cytidine-2'-O-)-methyltransferase RsmI; containing putative SAM binding site                                                                                                                   |
| Rv3351c | 7.03  | CoA-transferase                                                                                                                                                                                                                                                    |
| Rv3404c | 6.87  | Formyltransferase                                                                                                                                                                                                                                                  |
| Rv1603  | 6.78  | HisA. Phosphoribosylformimino-5-aminoimidazole carboxamide ribonucleotide (ProFAR) isomerase catalyzesthe fourth step in histidine biosynthesis, an isomerisation of the aminoaldose moiety of ProFAR to the aminoketose of PRFAR                                  |
| Rv2711  | 6.67  | Iron-dependent repressor and activator IdeR                                                                                                                                                                                                                        |
| Rv1289  | 6.47  | Hypothetical protein                                                                                                                                                                                                                                               |
| Rv2121c | 6.06  | ATP phosphoribosyltransferase HisG                                                                                                                                                                                                                                 |
| Rv0191  | 5.70  | Predicted arabinose efflux permease involved in transport of drug                                                                                                                                                                                                  |
| Rv0187  | 5.55  | O-methyltransferase, S-adenosylmethionine-dependent methyltransferases(SAM or AdoMet-MTase), class I; AdoMet-MTases are enzymes that use S-adenosyl-L-methionine (SAM or AdoMet) as a substrate for methyltransfer, creating the product S-adenosyl-L-homocysteine |
| Rv2769c | 5.54  | PE family protein PE27                                                                                                                                                                                                                                             |
| Rv1876  | 5.50  | Bacterioferritin BfrA (in fact, BfrB is more important, lacking BfrB would result in highly susceptible to killing by antibiotics,and unable persist in mice)                                                                                                      |
| Rv1377c | 5.47  | S-adenosylmethionine-dependent methyltransferases (SAM or AdoMet-MTase), class I; AdoMet-MTases are enzymes that use S-                                                                                                                                            |

|         |      |                                                                                                                                                                                                                                                                                 |
|---------|------|---------------------------------------------------------------------------------------------------------------------------------------------------------------------------------------------------------------------------------------------------------------------------------|
|         |      | adenosyl-L-methionine (SAM or AdoMet) as a substrate for methyltransfer, creating the product S-adenosyl-L-homocysteine (AdoHcy)                                                                                                                                                |
| Rv1581c | 5.46 | Phage protein                                                                                                                                                                                                                                                                   |
| Rv0757  | 5.36 | Two component system response transcriptional positive regulator PhoP (associated with virence)                                                                                                                                                                                 |
| Rv3455c | 5.31 | tRNA pseudouridine synthase A                                                                                                                                                                                                                                                   |
| Rv1478  | 5.14 | Peptidoglycan endopeptidase RipB, invasion protein                                                                                                                                                                                                                              |
| Rv1613  | 5.07 | Tryptophan synthase subunit alpha                                                                                                                                                                                                                                               |
| Rv0045c | 4.99 | Hydrolase                                                                                                                                                                                                                                                                       |
| Rv3442c | 4.96 | 30S ribosomal protein S9 RpsI                                                                                                                                                                                                                                                   |
| Rv2115c | 4.92 | Mycobacterial proteasome ATPase Mpa                                                                                                                                                                                                                                             |
| Rv0417  | 4.80 | Thiamin biosynthesis protein ThiG. Thiazole synthase (ThiG) is the tetrameric enzyme that is involved in the formation of the thiazole moiety of thiamin pyrophosphate, an essential ubiquitous cofactor that plays an important role in carbohydrate and amino acid metabolism |
| Rv0120c | 4.73 | Elongation factor G FusA2 (EF-G)                                                                                                                                                                                                                                                |
| Rv2525c | 4.67 | A substrate of the twin arginine translocation (tat) export system                                                                                                                                                                                                              |
| Rv0604  | 4.65 | Lipoprotein LpqO                                                                                                                                                                                                                                                                |
| Rv0116c | 4.63 | L,D-transpeptidase LdtA (proved to be associated with Mtb persistence)                                                                                                                                                                                                          |
| Rv1718  | 4.57 | Hypothetical protein                                                                                                                                                                                                                                                            |
| Rv2521  | 4.52 | Peroxiredoxin                                                                                                                                                                                                                                                                   |
| Rv1719  | 4.45 | Transcriptional regulator                                                                                                                                                                                                                                                       |
| Rv0618  | 4.34 | Galactose-1-phosphate uridylyltransferase                                                                                                                                                                                                                                       |
| Rv3756c | 4.33 | Glycine betaine/carnitine/choline/L-proline ABC transporter permease ProZ                                                                                                                                                                                                       |
| Rv1324  | 4.32 | Thioredoxin                                                                                                                                                                                                                                                                     |

|         |      |                                                                                                                                                                                                                                                                                              |
|---------|------|----------------------------------------------------------------------------------------------------------------------------------------------------------------------------------------------------------------------------------------------------------------------------------------------|
| Rv3008  | 4.29 | Uncharacterized membrane protein YhiD, involved in acid resistance                                                                                                                                                                                                                           |
| Rv3555c | 4.24 | Superfamily of nucleases including Short Patch Repair (Vsr) Endonucleases, archaeal Holliday junction resolvases, MutH methy-directed DNA mismatch-repair endonucleases                                                                                                                      |
| Rv2140c | 4.18 | PhosphatidylEthanolamine-Binding Protein (PEBP) domain present in bacteria and archaea                                                                                                                                                                                                       |
| Rv1301  | 4.18 | Threonylcarbamoyl-AMP synthase, tRNA threonylcarbamoyl adenosine modification protein                                                                                                                                                                                                        |
| Rv0760c | 4.13 | Nuclear transport factor 2 (NTF2)                                                                                                                                                                                                                                                            |
| Rv3673c | 4.13 | Membrane-anchored thioredoxin-like protein, TlpA-like family; composed of TlpA, ResA, DsbE and similar proteins. TlpA, ResA and DsbE are bacterial protein disulfide reductases with important roles in cytochrome maturation. They are membrane-anchored proteins with a soluble TRX domain |
| Rv0784  | 4.04 | Putative catalytic domain of uncharacterized bacterial proteins from the carbohydrate esterase 4 superfamily                                                                                                                                                                                 |
| Rv1154c | 4.04 | Hypothetical protein                                                                                                                                                                                                                                                                         |
| Rv3399  | 3.85 | S-adenosylmethionine-dependent methyltransferase, O-Methyltransferase involved in polyketide biosynthesis                                                                                                                                                                                    |
| Rv3176c | 3.85 | Epoxide hydrolase MesT                                                                                                                                                                                                                                                                       |
| Rv2751  | 3.84 | Methyltransferase                                                                                                                                                                                                                                                                            |
| Rv0233  | 3.80 | Ribonucleoside-diphosphate reductase subunit beta NrdB                                                                                                                                                                                                                                       |
| Rv3283  | 3.78 | Thiosulfate sulfurtransferase SseA                                                                                                                                                                                                                                                           |
| Rv1654  | 3.75 | Probable acetylglutamate kinase ArgB                                                                                                                                                                                                                                                         |
| Rv2172c | 3.74 | Hypothetical protein                                                                                                                                                                                                                                                                         |
| Rv0801  | 3.74 | Glo_EDI_BRP_like superfamily is found in a variety of structurally related metalloproteins, including the type I extradiol dioxygenases, glyoxalase I and a group of antibiotic resistance proteins                                                                                          |

|         |      |                                                                                                                                                                                                                                                       |
|---------|------|-------------------------------------------------------------------------------------------------------------------------------------------------------------------------------------------------------------------------------------------------------|
| Rv3709c | 3.66 | Aspartate kinase, Amino Acid Kinase Superfamily(AAK),                                                                                                                                                                                                 |
| Rv1460  | 3.63 | Transcriptional regulator, ArsR family, Arsenical Resistance Operon Repressor and similar prokaryotic, metal regulated homodimeric repressors. ARSR subfamily of helix-turn-helix bacterial transcription regulatory proteins (winged helix topology) |
| Rv1337  | 3.57 | Integral membrane protein                                                                                                                                                                                                                             |
| Rv1857  | 3.53 | Molybdate-binding lipoprotein ModA                                                                                                                                                                                                                    |
| Rv1879  | 3.50 | Predicted metal-dependent hydrolase, TIM-barrel fold                                                                                                                                                                                                  |
| Rv1667c | 3.49 | Second part of macrolide-transport ATP-binding protein ABC transporter                                                                                                                                                                                |
| Rv3268  | 3.49 | Hypothetical protein                                                                                                                                                                                                                                  |
| Rv3563  | 3.46 | Acyl-CoA dehydrogenase FadE32                                                                                                                                                                                                                         |
| Rv1078  | 3.45 | Hypothetical protein                                                                                                                                                                                                                                  |
| Rv2245  | 3.45 | 3-oxoacyl-ACP synthase 1, Beta-ketoacyl-acyl carrier protein (ACP) synthase(KAS), type I and II. KASs are responsible for the elongation steps in fatty acid biosynthesis.                                                                            |
| Rv3382c | 3.41 | LYTB-related protein LytB1,4-hydroxy-3-methylbut-2-enyl diphosphate reductase                                                                                                                                                                         |
| Rv1712  | 3.40 | Cytidylate kinase                                                                                                                                                                                                                                     |
| Rv3837c | 3.38 | Phosphoglycerate mutase                                                                                                                                                                                                                               |
| Rv2857c | 3.37 | Short-chain type dehydrogenase/reductase,Rossmann-fold NAD(P)(+)-binding proteins                                                                                                                                                                     |
| Rv1919c | 3.33 | Pyrabactin resistance 1 (PYR1), PYR1-like (PYL), regulatory component of abscisic acid receptors (RCARs), and related proteins                                                                                                                        |
| Rv1597  | 3.29 | S-adenosylmethionine-dependent methyltransferases (SAM or AdoMet-MTase)                                                                                                                                                                               |
| Rv3378c | 3.28 | Diterpene synthase                                                                                                                                                                                                                                    |
| Rv2965c | 3.24 | Phosphopantetheine adenylyltransferase                                                                                                                                                                                                                |
| Rv3305c | 3.21 | N-acyl-L-amino acid amidohydrolase AmiA                                                                                                                                                                                                               |

|         |      |                                                                                                                                                                                                                                                                                            |
|---------|------|--------------------------------------------------------------------------------------------------------------------------------------------------------------------------------------------------------------------------------------------------------------------------------------------|
| Rv2895c | 3.20 | Mycobactin utilization protein ViuB                                                                                                                                                                                                                                                        |
| Rv1083  | 3.19 | N-acetylmuramic acid-6-phosphate etherase                                                                                                                                                                                                                                                  |
| Rv0421c | 3.19 | Hydrolase of the alpha/beta-hydrolase fold                                                                                                                                                                                                                                                 |
| Rv1056  | 3.14 | Hypothetical protein                                                                                                                                                                                                                                                                       |
| Rv0134  | 3.10 | Epoxide hydrolase EphF                                                                                                                                                                                                                                                                     |
| Rv0283  | 3.09 | ESX-3 secretion system protein EccB3, type VII secretion protein EccB, Actinobacterial                                                                                                                                                                                                     |
| Rv3154  | 3.07 | NADH-quinone oxidoreductase subunit J                                                                                                                                                                                                                                                      |
| Rv2821c | 3.06 | CRISPR type III-associated RAMP protein Csm3                                                                                                                                                                                                                                               |
| Rv1949c | 3.05 | Carboxyl transferase                                                                                                                                                                                                                                                                       |
| Rv3089  | 3.05 | Long chain-fatty-acid--CoA ligase FadD13                                                                                                                                                                                                                                                   |
| Rv0459  | 3.03 | Hypothetical protein                                                                                                                                                                                                                                                                       |
| Rv3420c | 3.03 | Ribosomal-protein-alanine acetyltransferase, RimI                                                                                                                                                                                                                                          |
| Rv0503c | 3.02 | Cyclopropane mycolic acid synthase,S-adenosylmethionine-dependent methyltransferases (SAM or AdoMet-MTase), class I; AdoMet-MTases are enzymes that use S-adenosyl-L-methionine (SAM or AdoMet) as a substrate for methyltransfer, creating the product S-adenosyl-L-homocysteine (AdoHcy) |
| Rv0414c | 3.02 | Thiamine-phosphate pyrophosphorylase ThiE (TMP pyrophosphorylase) (TMP-PPASE) (thiamine-phosphate synthase)                                                                                                                                                                                |
| Rv3174  | 3.01 | Short-chain dehydrogenase/reductase, Rossmann-fold NAD(P)(+)-binding proteins                                                                                                                                                                                                              |
| Rv2049c | 3.01 | Hypothetical protein                                                                                                                                                                                                                                                                       |

SNR: signal to noise ratio.
